# Supplementary material for: 18-Membered cyclic esters derived from glycolide and lactide: preparations, structures and coordination to sodium ions
Source: Royal Society of Chemistry journal article supplement (doi:10.1039/b709081a), 2007-01-01
Supplement: b709081a.pdf [file b709081a.pdf]

18-membered Cyclic Esters Derived from Glycolide and Lactide: Preparations, Structures  
and Coordination to Sodium Ions

Supporting Information

Malcolm H. Chisholm,\* Judith C. Gallucci and Hongfeng Yin

Department of Chemistry, The Ohio State University

100 West 18<sup>th</sup> Avenue, Columbus, OH 43210-1185 USA

<sup>1</sup>H NMR and calculations for A<sub>6</sub> molecules

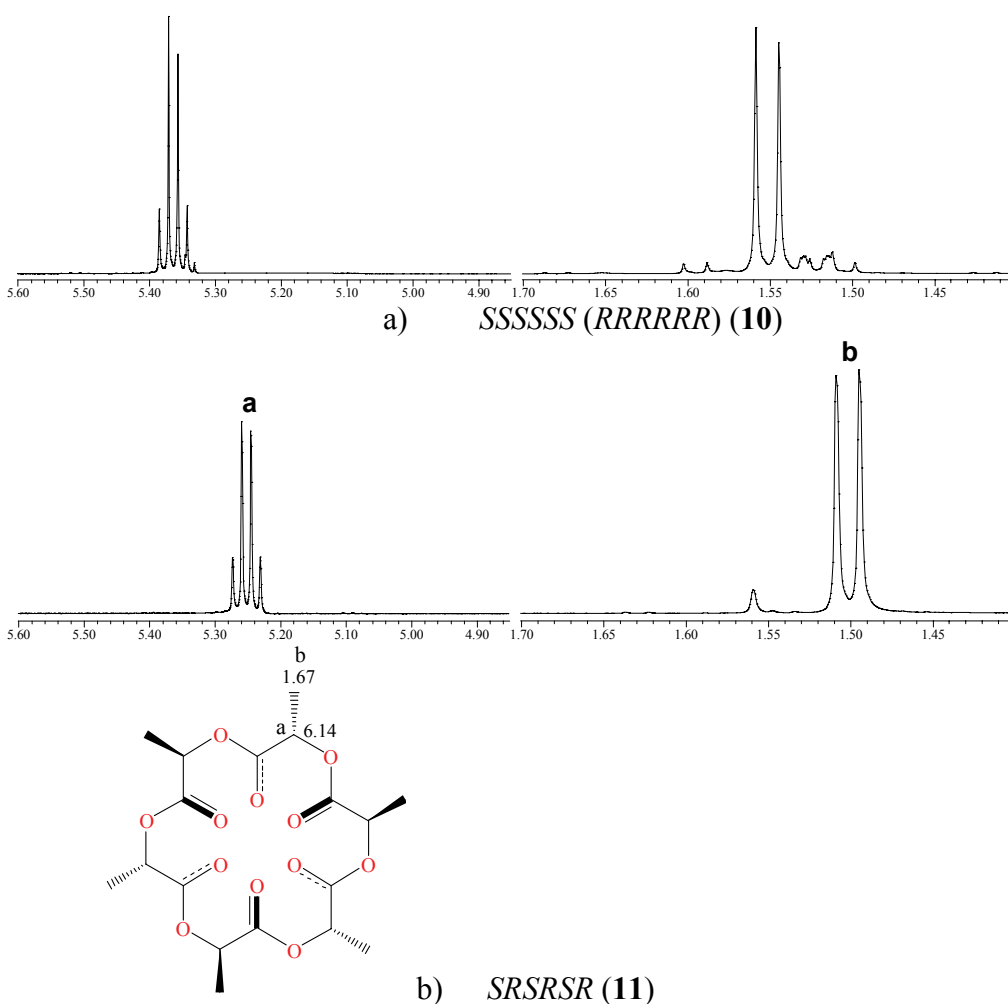

**Figure S1** <sup>1</sup>H NMR spectra (CDCl<sub>3</sub>, 500 MHz) of isomer **10** and **11**, and calculated chemical shifts for **11**.

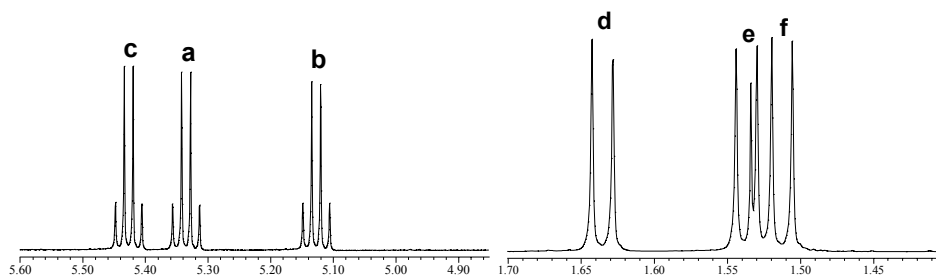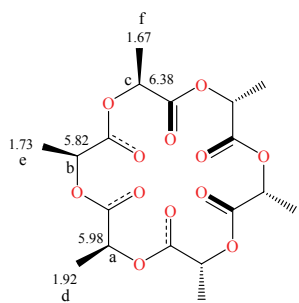

a) SSSRRR (4)

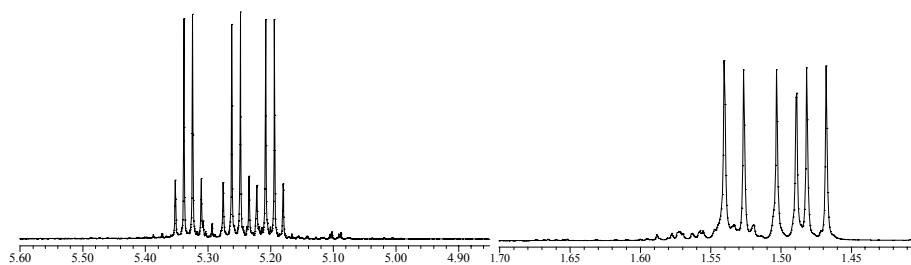

b) SRRSRR (RSSRSS) (7)

**Figure S2**  $^1\text{H}$  NMR spectra ( $\text{CDCl}_3$ , 500 MHz) of isomer 4, and 7 and calculated chemical shifts for 4.

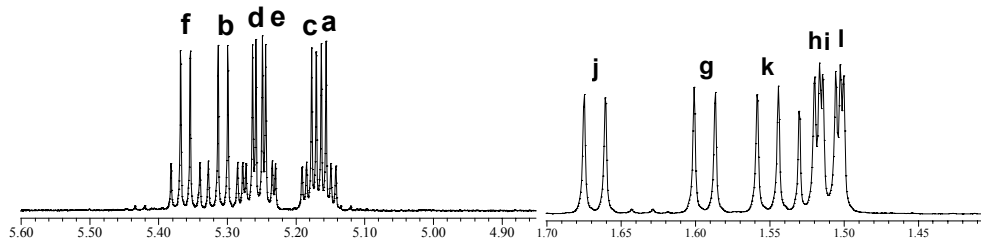

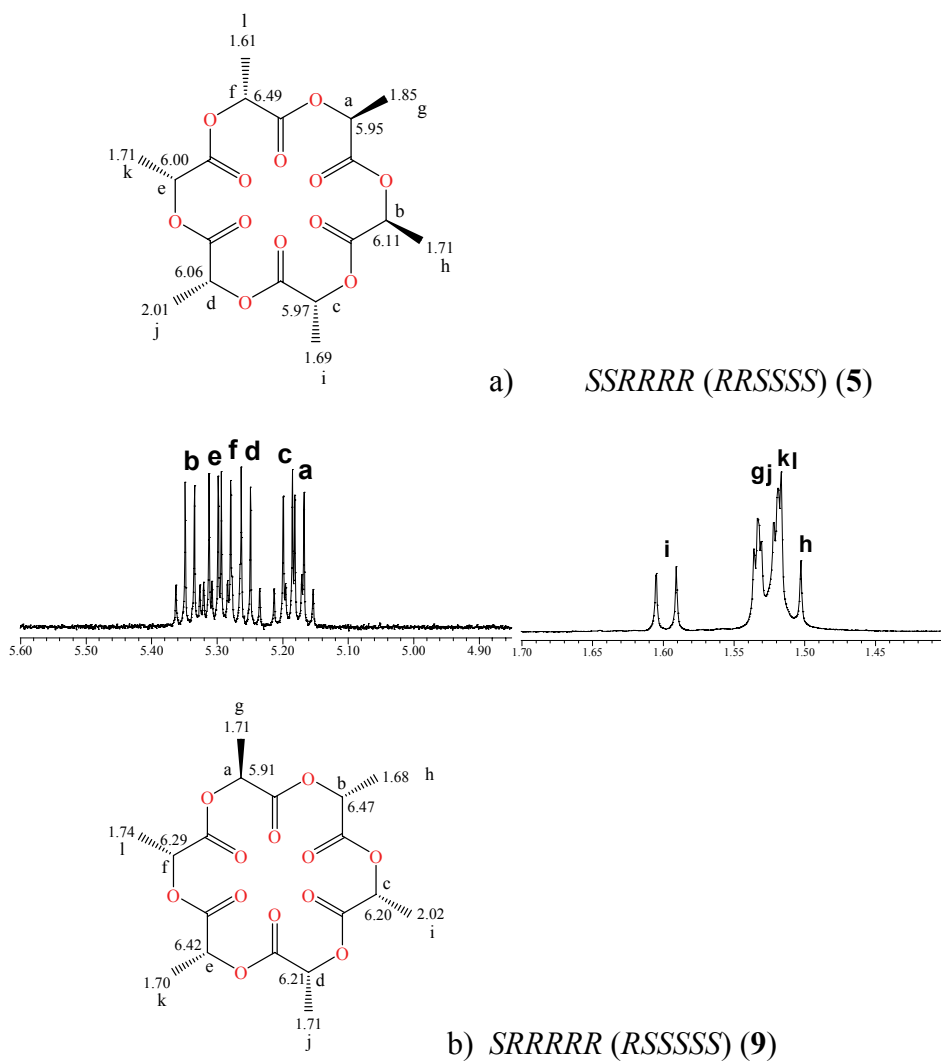

**Figure S3**  $^1\text{H}$  NMR spectra ( $\text{CDCl}_3$ , 500 MHz) and calculated chemical shifts of isomer 5 and 9.

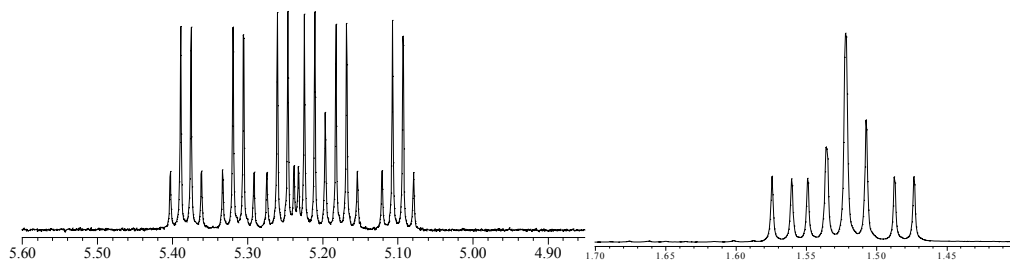

a) *SSRSRR (RRSRSS)* (**6**)

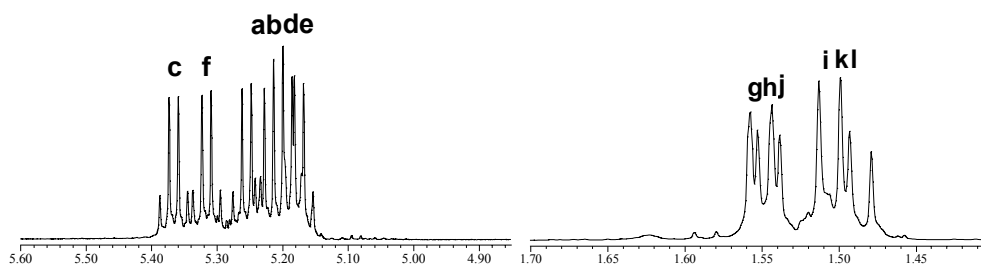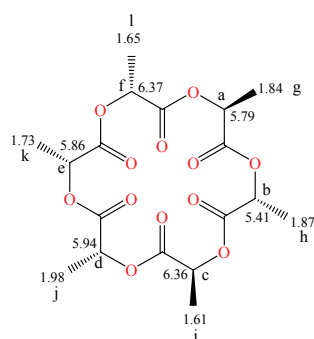

b) *SRSRRR (RSRSSS)* (**8**)

**Figure S4** <sup>1</sup>H NMR spectra (CDCl<sub>3</sub>, 500 MHz) of isomer **6** and **8** and calculated chemical shifts for **8**.

| Compound                                     | <b>1</b>                                         | <b>2</b>                                                            | <b>3</b>                                        |
|----------------------------------------------|--------------------------------------------------|---------------------------------------------------------------------|-------------------------------------------------|
| Formula                                      | C <sub>25</sub> H <sub>25</sub> B N <sub>2</sub> | C <sub>40</sub> H <sub>38</sub> B N <sub>2</sub> Na O <sub>12</sub> | C <sub>12</sub> H <sub>12</sub> O <sub>12</sub> |
| Formula weight                               | 364.28                                           | 772.52                                                              | 348.22                                          |
| Cryst system                                 | orthorhombic                                     | triclinic                                                           | monoclinic                                      |
| Space group                                  | Pbca                                             | P $\bar{1}$                                                         | P 2 <sub>1</sub> /c                             |
| a(Å)                                         | 15.2297(11)                                      | 12.920(1)                                                           | 7.668(1)                                        |
| b(Å)                                         | 11.7129(8)                                       | 13.473(1)                                                           | 5.901(1)                                        |
| c(Å)                                         | 22.5154(18)                                      | 13.977(2)                                                           | 16.004(3)                                       |
| α(deg)                                       |                                                  | 80.972(4)                                                           |                                                 |
| β(deg)                                       |                                                  | 64.021(4)                                                           | 102.408(9)                                      |
| γ(deg)                                       |                                                  | 63.137(5)                                                           |                                                 |
| V(Å <sup>3</sup> )                           | 4016.4(5)                                        | 1948.6(3)                                                           | 707.3(2)                                        |
| Z                                            | 8                                                | 2                                                                   | 2                                               |
| d(calcd)(g/cm <sup>3</sup> )                 | 1.205                                            | 1.317                                                               | 1.635                                           |
| absorp coeff(mm <sup>-1</sup> )              | 0.015                                            | 0.106                                                               | 0.151                                           |
| Reflections collected                        | 48843                                            | 44653                                                               | 17673                                           |
| Independent reflections                      | 3750                                             | 6794                                                                | 1618                                            |
| R1(F) <sup>a</sup> (all data)                | 0.0533                                           | 0.0805                                                              | 0.0514                                          |
| wR2(F <sup>2</sup> ) <sup>a</sup> (all data) | 0.1131                                           | 0.1388                                                              | 0.1097                                          |

**Table S1** Crystallographic details for DMAP-BPh<sub>3</sub> (**1**), (CH<sub>2</sub>C(O)O)<sub>6</sub>Na<sup>+</sup>BPh<sub>4</sub><sup>-</sup>·(CH<sub>3</sub>CN)<sub>2</sub> (**2**) and CH<sub>2</sub>C(O)O)<sub>6</sub>(**3**).

$$^a R1(F) = \sum ||F_o| - |F_c|| / \sum |F_o|$$

$$wR2(F^2) = [\sum [w(F_o^2 - F_c^2)^2] / \sum w(F_o^2)^2]^{1/2}$$

| Compounds                       | <b>5</b>                                        | <b>9</b>                                        | <b>12</b>                                            |
|---------------------------------|-------------------------------------------------|-------------------------------------------------|------------------------------------------------------|
| Formula                         | C <sub>18</sub> H <sub>24</sub> O <sub>12</sub> | C <sub>18</sub> H <sub>24</sub> O <sub>12</sub> | C <sub>44</sub> H <sub>47</sub> O <sub>12</sub> NBNa |
| Formula weight                  | 432.37                                          | 432.37                                          | 815.62                                               |
| Cryst system                    | monoclinic                                      | orthorhombic                                    | monoclinic                                           |
| Space group                     | P2 <sub>1</sub> /n                              | P2 <sub>1</sub> 2 <sub>1</sub> 2 <sub>1</sub>   | P 2 <sub>1</sub> /n                                  |
| a(Å)                            | 8.432(1)                                        | 10.663(2)                                       | 9.986(2)                                             |
| b(Å)                            | 16.513(2)                                       | 11.967(3)                                       | 19.900(3)                                            |
| c(Å)                            | 14.964(2)                                       | 16.489(4)                                       | 21.545(4)                                            |
| α(deg)                          |                                                 |                                                 |                                                      |
| β(deg)                          | 93.048(5)                                       |                                                 | 90.376(6)                                            |
| γ(deg)                          |                                                 |                                                 |                                                      |
| V(Å <sup>3</sup> )              | 2080.7(4)                                       | 2104.1(8)                                       | 4281(1)                                              |
| Z                               | 4                                               | 4                                               | 4                                                    |
| d(calcd)(g/cm <sup>3</sup> )    | 1.380                                           | 1.365                                           | 1.265                                                |
| absorp coeff(mm <sup>-1</sup> ) | 0.118                                           | 0.116                                           | 0.100                                                |
| Reflections collected           | 34054                                           | 16936                                           | 41693                                                |
| Independent reflections         | 4751                                            | 2124                                            | 7541                                                 |
| R1(F) (all data)                | 0.0573                                          | 0.0387                                          | 0.0895                                               |
| wR2(F <sup>2</sup> ) (all data) | 0.0905                                          | 0.0881                                          | 0.0929                                               |

**Table S2** Crystallographic details for compounds (*S,S,R,R,R,R*)- (CH<sub>3</sub>CHC(O)O)<sub>6</sub> (**5**), (*S,R,R,R,R,R*)- (CH<sub>3</sub>CHC(O)O)<sub>6</sub> (**9**) and Na[(*S,R,S,R,S,R*)- (CH<sub>3</sub>CHC(O)O)<sub>6</sub>]BPh<sub>4</sub>·CH<sub>3</sub>CN (**12**).  
 DMAP-BPh<sub>3</sub> (**1**)

|                  |            |              |            |
|------------------|------------|--------------|------------|
| B-C(7)           | 1.631(2)   | B-C(13)      | 1.636(2)   |
| B-N(1)           | 1.636(2)   | B-C(1)       | 1.637(2)   |
| C(7)-B-C(13)     | 112.03(12) | C(7)-B-N(1)  | 108.65(11) |
| C(13)-B-N(1)     | 104.74(11) | C(7)-B-C(1)  | 110.77(12) |
| C(13)-B-C(1)     | 111.89(12) | N(1)-B-C(1)  | 108.47(11) |
| C(23)-N(1)-B     | 125.17(12) | C(19)-N(1)-B | 119.06(12) |
| C(23)-N(1)-C(19) | 115.74(13) |              |            |

(CH<sub>2</sub>C(O)O)<sub>6</sub>Na<sup>+</sup>BPh<sub>4</sub><sup>-</sup>(CH<sub>3</sub>CN)<sub>2</sub> (2)

|               |           |               |           |
|---------------|-----------|---------------|-----------|
| Na-O(7)       | 2.346(2)  | Na-O(1)       | 2.354(2)  |
| Na-O(11)      | 2.354(2)  | Na-O(9)       | 2.400(2)  |
| Na-N(1)       | 2.470(2)  | Na-N(2)       | 2.521(2)  |
| O(1)-C(31)    | 1.195(2)  | O(2)-C(29)    | 1.196(3)  |
| O(3)-C(33)    | 1.203(3)  | O(7)-C(35)    | 1.201(2)  |
| O(9)-C(37)    | 1.207(2)  | O(11)-C(39)   | 1.207(2)  |
| O(7)-Na-O(1)  | 87.98(6)  | O(7)-Na-O(11) | 92.56(5)  |
| O(1)-Na-O(11) | 171.03(6) | O(7)-Na-O(9)  | 86.54(5)  |
| O(1)-Na-O(9)  | 95.53(6)  | O(11)-Na-O(9) | 93.44(5)  |
| O(7)-Na-N(1)  | 170.91(7) | O(9)-Na-N(2)  | 175.17(7) |
| N(1)-Na-N(2)  | 98.73(7)  | C(37)-O(9)-Na | 165.7(1)  |

(C<sub>2</sub>H<sub>2</sub>O<sub>2</sub>)<sub>6</sub> (3)

|                |          |                  |          |
|----------------|----------|------------------|----------|
| O(1)-C(1)      | 1.199(2) | O(2)-C(3)        | 1.205(2) |
| O(3)-C(5)      | 1.199(2) | O(4)-C(1)        | 1.350(2) |
| O(4)-C(6)#1    | 1.438(2) | O(5)-C(3)        | 1.338(2) |
| O(5)-C(2)      | 1.432(2) | O(6)-C(5)        | 1.343(2) |
| O(6)-C(4)      | 1.437(2) | O(1)-C(1)-O(4)   | 124.3(1) |
| O(1)-C(1)-C(2) | 126.0(1) | O(4)-C(1)-C(2)   | 109.7(1) |
| O(5)-C(2)-C(1) | 109.8(1) | C(1)-O(4)-C(6)#1 | 114.1(1) |

#1 is the symmetry operation: -x, -y, -z

(SSRRRR)-(CH<sub>3</sub>CHC(O)O)<sub>6</sub> (5)

|                   |           |                   |           |
|-------------------|-----------|-------------------|-----------|
| O(1)-C(1)         | 1.200(1)  | O(3)-C(4)         | 1.195(1)  |
| O(5)-C(7)         | 1.202(1)  | O(7)-C(10)        | 1.195(2)  |
| O(9)-C(13)        | 1.202(2)  | O(11)-C(16)       | 1.204(1)  |
| O(2)-C(1)         | 1.354(1)  | O(4)-C(4)         | 1.338(2)  |
| O(6)-C(7)         | 1.339(1)  | O(8)-C(10)        | 1.353(1)  |
| O(10)-C(13)       | 1.333(2)  | O(12)-C(16)       | 1.336(2)  |
| O(2)-C(2)         | 1.445(1)  | O(4)-C(5)         | 1.453(1)  |
| O(6)-C(8)         | 1.442(1)  | O(8)-C(11)        | 1.446(2)  |
| O(10)-C(14)       | 1.458(2)  | O(12)-C(17)       | 1.442(1)  |
| C(1)-O(2)-C(2)    | 114.5 (1) | C(4)-O(4)-C(5)    | 114.0 (1) |
| C(7)-O(6)-C(8)    | 116.8(1)  | C(10)-O(8)-C(11)  | 116.3(1)  |
| C(13)-O(10)-C(14) | 117.3(1)  | C(16)-O(12)-C(17) | 116.7(1)  |

(SRRRRR)-(CH<sub>3</sub>CHC(O)O)<sub>6</sub> (9)

|           |          |           |          |
|-----------|----------|-----------|----------|
| O(1)-C(1) | 1.194(3) | O(3)-C(4) | 1.202(3) |
|-----------|----------|-----------|----------|

|                   |           |                   |           |
|-------------------|-----------|-------------------|-----------|
| O(5)-C(7)         | 1.198(3)  | O(7)-C(10)        | 1.198(3)  |
| O(9)-C(13)        | 1.201(3)  | O(11)-C(16)       | 1.203(3)  |
| O(2)-C(2)         | 1.444(3)  | C(2)-C(3)         | 1.511(4)  |
| C(2)-C(4)         | 1.518(4)  | O(4)-C(5)         | 1.457(3)  |
| C(5)-C(6)         | 1.513(4)  | C(5)-C(7)         | 1.517(4)  |
| O(6)-C(8)         | 1.444(3)  | C(8)-C(9)         | 1.513(4)  |
| C(8)-C(10)        | 1.519(4)  | O(8)-C(11)        | 1.450(3)  |
| O(10)-C(14)       | 1.441(3)  | C(14)-C(15)       | 1.521(4)  |
| C(14)-C(16)       | 1.517(4)  | O(12)-C(17)       | 1.438(3)  |
| C(17)-C(18)       | 1.512(4)  | C(1)-C(17)        | 1.519(4)  |
| C(1)-O(2)-C(2)    | 114.2(2)  | C(4)-O(4)-C(5)    | 117.2(2)  |
| C(7)-O(6)-C(8)    | 114.8 (2) | C(10)-O(8)-C(11)  | 114.6 (2) |
| C(13)-O(10)-C(14) | 115.8(2)  | C(16)-O(12)-C(17) | 116.4(2)  |

(*SRSRSR*)- (CH<sub>3</sub>CHC(O)O)<sub>6</sub> (**11**)

|                  |          |                  |          |
|------------------|----------|------------------|----------|
| O(1)-C(1)        | 1.190(2) | O(2)-C(1)        | 1.356(3) |
| O(2)-C(2)        | 1.450(2) | C(1)-C(2)#1      | 1.526(2) |
| C(2)-C(3)        | 1.515(3) | C(2)-C(1)#2      | 1.526(2) |
| C(1)-O(2)-C(2)   | 114.4(2) | O(1)-C(1)-O(2)   | 124.4(2) |
| O(1)-C(1)-C(2)#1 | 126.2(2) | O(2)-C(1)-C(2)#1 | 109.4(2) |
| O(2)-C(2)-C(3)   | 107.2(2) | O(2)-C(2)-C(1)#2 | 107.2(1) |
| C(3)-C(2)-C(1)#2 | 110.9(2) |                  |          |

#1 is the symmetry operation: x-y, x, -z

#2 is the symmetry operation: y, -x+y, -z

Na[(*S,R,S,R,S,R*)- (CH<sub>3</sub>CHC(O)O)<sub>6</sub>]<sub>2</sub>BPh<sub>4</sub>·CH<sub>3</sub>CN (**12**)

|                  |           |                    |           |
|------------------|-----------|--------------------|-----------|
| Na-O(5A)#1       | 2.317(1)  | Na-O(5B)           | 2.322(1)  |
| Na-O(3B)#2       | 2.339(1)  | Na-O(1A)#1         | 2.342(1)  |
| Na-O(1B)         | 2.359(1)  | Na-O(3A)           | 2.368(1)  |
| O(1A)-C(1A)      | 1.204(2)  | O(3A)-C(4A)        | 1.208(2)  |
| O(5A)-C(7A)      | 1.202(2)  | O(1B)-C(1B)        | 1.205(2)  |
| O(3B)-C(4B)      | 1.203(2)  | O(5B)-C(7B)        | 1.204(2)  |
| O(5A)#1-Na-O(5B) | 168.74(5) | O(5A)#1-Na-O(3B)#2 | 77.60(5)  |
| O(5B)-Na-O(3B)#2 | 94.66(5)  | O(5A)#1-Na-O(1A)#1 | 88.51(5)  |
| O(5B)-Na-O(1A)#1 | 100.32(5) | O(3B)#2-Na-O(1A)#1 | 163.36(5) |
| O(5A)#1-Na-O(1B) | 97.30(5)  | O(5B)-Na-O(1B)     | 90.93(5)  |
| O(3B)#2-Na-O(1B) | 90.92(5)  | O(1A)#1-Na-O(1B)   | 81.70(5)  |
| O(5A)#1-Na-O(3A) | 91.82(5)  | O(5B)-Na-O(3A)     | 80.59(5)  |
| O(3B)#2-Na-O(3A) | 94.91(5)  | O(1A)#1-Na-O(3A)   | 94.64(5)  |
| O(1B)-Na-O(3A)   | 170.05(5) | C(1A)-O(1A)-Na#1   | 161.1(1)  |
| C(4A)-O(3A)-Na   | 159.7(1)  | C(7A)-O(5A)-Na#1   | 165.7(1)  |

#1 is the symmetry operation: -x+2, -y, -z

#2 is the symmetry operation: -x+1, -y, -z

**Table S3.** Selected bond distances (Å) and angles (°) for complexes **1**, **2**, **3**, **5**, **9**, **11**, **12**.
